# Supplementary material for: Bedside formulation of a personalized multi-neoantigen vaccine against mammary carcinoma
Source: HighWire-hosted journal article supplement (doi:10.1136/jitc-2021-002927), 2022-01-01

**Supplementary Figure 4. Representative immunohistochemistry staining of CD4<sup>+</sup> T cell for tumours treated with Q $\beta$ (1668) as a control or Q $\beta$ (1668)-NeoAG<sub>L</sub>. Arrows point to intratumoural CD4<sup>+</sup> T cell. 3 samples per group were analysed.**

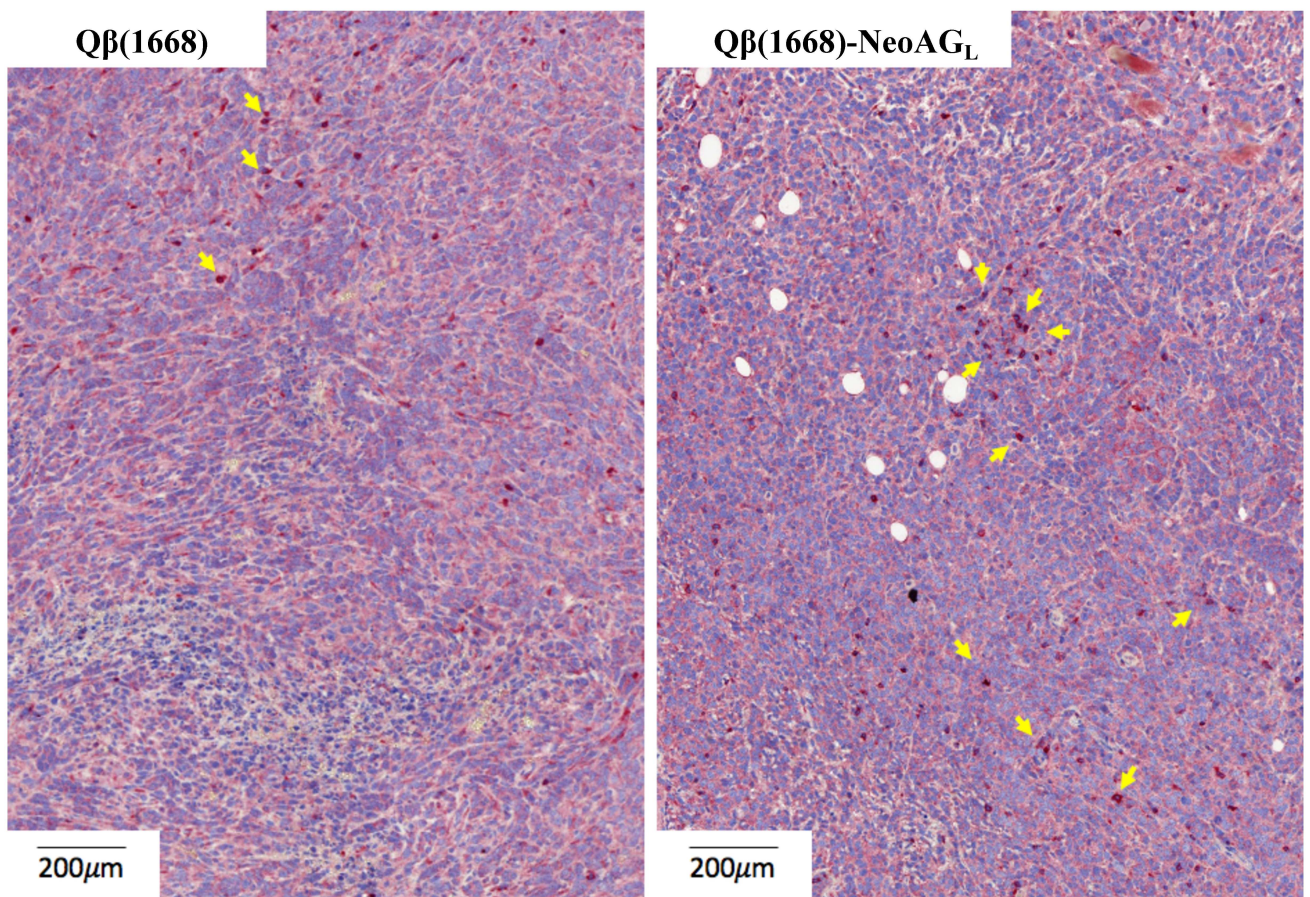

Supplement: jitc-2021-002927supp006_data_supplement.pdf [file jitc-2021-002927supp006_data_supplement.pdf]
